# Supplementary material for: Comparative analysis of newly identified rodent arteriviruses and porcine reproductive and respiratory syndrome virus to characterize their evolutionary relationships
Source: Front Vet Sci. 2023 Apr 3;10:1174031. doi: 10.3389/fvets.2023.1174031 (PMC10106604; doi:10.3389/fvets.2023.1174031)
Supplement: Supplementary file 2 [file Table_1.XLSX]

## Sheet: 相似度
Table S1 Comparison of nucleotide and amino acid identities and other genomic features of rodent arterivirus, PRRSV type 1, PRRSV type2 and other representative Arteriviruses
ArteVs			Genome features		Pairwise nucleotide/amino acid identity (%)
	Accession ID	Name	Size (bases)	G+C content（%）	RtMc-Arterivirus/Tibet2014					RtEi-Arterivirus/SX2014					RtMruf-Arterivirus/JL2014					RtClon-Arterivirus/NX2015					RtClan-Arterivirus/GZ2015					RtDs-Arterivirus-4/IM2014
					RdRp	Hel	3CLpro	N		RdRp	Hel	3CLpro	N		RdRp	Hel	3CLpro	N		RdRp	Hel	3CLpro	N		RdRp	Hel	3CLpro	N		RdRp	Hel	3CLpro
rodent arterivirus
	KY369967	RtMc-Arterivirus/Tibet2014	15224	51.8						67.80/75.50	64.40/69.84	64.71/69.12	63.25/64.57		68.73/77.98	64.85/70.98	68.79/75.98	62.99/64.57		69.41/78.29	64.55/71.66	66.50/71.08	62.47/62.99		63.99/67.54	56.24/56.24	55.07/54.90	56.35/54.76		60.68/61.92	52.44/52.00	53.43/50.98
	KY369968	RtEi-Arterivirus/SX2014	15275	51.6	67.80/75.50	64.40/69.84	64.71/69.12	63.25/64.57							73.13/81.40	69.84/76.87	67.65/79.90	78.23/81.45		72.82/84.19	66.29/73.47	66.50/74.51	75.27/74.19		63.32/68.01	56.99/58.73	57.03/54.90	54.30/55.65		58.57/60.99	51.48/52.44	52.29/49.51
	KP280006	RtMruf-Arterivirus/JL2014	15728	52.5	68.73/77.98	64.85/70.98	68.79/75.98	62.99/64.57		73.13/81.40	69.84/76.87	67.65/79.90	78.23/81.45							73.59/84.65	72.18/82.77	66.01/79.41	79.30/83.06		64.97/67.54	56.54/58.28	54.74/55.88	56.99/56.45		60.37/62.38	51.63/51.33	54.74/54.90
	KU302440	RtClon-Arterivirus/NX2015	15099	53.8	69.41/78.29	64.55/71.66	66.50/71.08	62.47/62.99		72.82/84.19	66.29/73.47	66.50/74.51	75.27/74.19		73.59/84.65	72.18/82.77	66.01/79.41	79.30/83.06							64.71/67.54	55.63/55.56	57.03/54.90	53.76/52.42		59.70/61.92	51.48/52.00	56.37/55.88
	KY369969	RtClan-Arterivirus/GZ2015	14943	52.1	63.99/67.54	56.24/56.24	55.07/54.90	56.35/54.76		63.32/68.01	56.99/58.73	57.03/54.90	54.30/55.65		64.97/67.54	56.54/58.28	54.74/55.88	56.99/56.45		64.71/67.54	55.63/55.56	57.03/54.90	53.76/52.42							60.84/61.82	53.63/54.22	54.84/53.69
	KP280007	RtDs-Arterivirus-4/IM2014	7703	49.9	60.68/61.92	52.44/52.00	53.43/50.98	/		58.57/60.99	51.48/52.44	52.29/49.51	/		60.37/62.38	51.63/51.33	54.74/54.90	/		59.70/61.92	51.48/52.00	56.37/55.88	/		60.84/61.82	53.63/54.22	54.84/53.69	/
	KP280008	RtDs-Arterivirus-1/IM2014	2856	47.5	/	/	/	/		/	/	/	/		/	/	/	/		/	/	/	/		/	/	/	/		/	/	/
PRRSV-1
	M96262	Lelystad virus	15111	52.6	64.76/71.36	60.11/63.35	60.62/63.24	55.64/54.14		65.22/72.29	59.73/64.93	58.50/63.24	57.95/57.69		66.00/72.76	61.39/66.29	61.76/65.69	63.33/62.31		66.25/71.83	60.18/66.29	61.93/64.22	58.46/58.46		63.01/68.93	58.22/59.05	54.41/55.39	54.10/51.54		60.47/64.24	52.92/54.10	53.37/51.23
	GU047344	BJEU06-1	15059	52.4	65.27/71.36	59.28/63.35	58.50/61.27	57.14/54.89		64.60/72.29	58.60/64.71	58.01/62.25	58.72/58.46		64.24/72.29	60.48/65.61	60.46/63.24	62.56/61.54		65.48/71.21	59.35/66.29	61.27/65.20	57.18/57.69		62.91/68.32	58.14/59.05	54.41/55.88	52.82/49.23		59.96/64.09	52.55/53.88	54.84/54.19
	GQ461593	SHE	15120	52.5	65.12/71.83	59.95/63.80	59.80/61.27	55.39/54.89		65.27/72.14	59.80/64.25	59.97/64.71	57.44/56.92		66.00/73.07	60.78/65.84	61.60/64.22	61.28/61.54		66.10/71.67	60.18/65.84	61.93/63.73	58.46/58.46		62.96/68.78	56.71/58.37	54.74/56.37	52.82/50.77		60.84/64.55	52.62/53.22	53.86/51.23
	KC492506	NVDC-FJ	15058	52.5	64.50/71.67	60.26/62.90	58.82/63.73	57.64/54.14		65.07/72.29	60.11/65.16	58.66/61.76	57.18/56.92		65.84/72.29	60.94/65.61	60.95/64.71	63.08/62.31		65.69/71.83	60.18/65.61	59.80/64.22	59.23/58.46		63.32/68.93	56.64/58.37	56.54/55.39	52.82/52.31		60.47/63.93	51.88/53.22	53.86/53.20
	KP860912	FJEU13	15093	52.3	64.65/71.98	60.63/63.57	58.66/60.78	55.14/54.14		64.55/72.60	59.88/64.71	57.03/63.73	57.95/56.15		64.91/72.45	61.69/65.84	60.46/64.71	60.77/58.46		65.79/71.98	60.56/66.29	61.76/63.73	56.92/56.15		63.99/67.85	57.54/58.82	53.92/56.37	53.08/50.77		59.75/64.55	53.44/54.32	52.71/52.71
	KF287129	HK3	14926	46.7	64.81/71.83	60.33/63.35	60.29/63.24	56.39/53.38		65.07/72.14	59.28/64.48	57.35/62.75	57.18/59.23		65.94/72.60	59.80/65.61	61.44/66.18	60.51/61.54		66.62/72.45	60.41/66.52	62.58/65.20	57.18/58.46		62.49/68.93	57.16/57.92	53.59/55.88	54.36/53.85		60.27/64.09	52.33/53.66	52.71/51.72
	KF287130	HK5	14926	52.6	64.55/71.98	60.11/63.35	60.78/63.24	55.89/54.14		64.86/72.45	60.11/64.93	57.35/62.25	57.44/59.23		65.74/72.29	59.73/65.61	61.27/65.69	60.77/61.54		65.89/72.14	61.01/66.06	61.93/63.73	56.92/59.23		62.08/68.47	57.47/58.14	53.43/55.39	54.36/52.31		60.42/63.93	53.14/53.22	52.38/50.74
	AY366525	EuroPRRSV	15047	52.3	65.07/71.05	61.09/63.57	58.82/63.24	55.39/54.14		65.12/71.83	59.05/64.48	59.15/63.73	57.44/57.69		65.43/72.76	60.78/66.06	61.11/66.67	62.56/62.31		66.25/71.98	59.88/66.74	62.25/64.71	57.95/58.46		63.37/68.47	57.84/58.60	54.90/55.39	53.33/51.54		60.63/64.40	52.62/53.88	54.19/51.72
	DQ489311	SD01-08	15047	52.6	65.38/71.52	60.18/63.57	59.97/64.22	55.14/54.14		64.91/72.14	59.80/64.48	58.01/62.75	58.72/57.69		65.89/72.76	61.39/65.84	62.09/66.18	63.08/62.31		66.20/71.98	60.11/66.52	61.27/64.71	57.95/58.46		63.47/68.62	58.45/58.60	54.41/56.37	53.85/51.54		60.11/64.40	52.62/53.44	51.89/50.74
	GU067771	Amervac PRRS	15098	52.6	65.12/71.83	59.88/63.80	59.97/61.27	55.39/54.89		65.27/72.14	59.73/64.25	60.13/64.71	57.44/56.92		66.00/73.07	60.86/65.84	61.44/63.73	61.28/61.54		66.10/71.67	60.26/65.84	62.09/64.22	58.46/58.46		62.96/68.78	56.79/58.37	54.58/56.37	52.82/50.77		60.84/64.55	52.55/53.22	54.02/51.23
	EU071236/EU071269	SHV	/	50.4	/	/	/	57.62/53.49		/	/	/	59.11/57.03		/	/	/	61.20/59.38		/	/	/	57.55/57.81		/	/	/	53.28/51.18		/	/	/
	DQ324689/DQ324722	Vas-2	/	50.8	/	/	/	61.24/55.04		/	/	/	57.81/57.81		/	/	/	60.94/60.16		/	/	/	58.07/58.59		/	/	/	53.81/54.33		/	/	/
	JF802085	Lena	15001	52.7	64.86/72.45	59.46/62.16	60.13/61.27	57.88/55.81		65.58/72.14	59.16/63.29	58.33/62.25	58.59/60.16		66.67/73.37	59.61/65.32	60.13/64.22	62.76/63.28		66.92/72.91	60.14/66.22	61.93/64.22	59.11/60.94		63.88/68.16	55.56/56.31	55.88/56.86	53.02/53.54		60.32/63.93	50.63/51.88	54.02/54.68
	DQ324686/DQ324719	Soz-6	/	50.6	/	/	/	58.14/57.36		/	/	/	58.33/58.59		/	/	/	60.42/60.16		/	/	/	58.59/59.38		/	/	/	52.23/51.18		/	/	/
PRRSV-2
	DQ176019	MN184A	15019	52.8	69.30/76.90	65.61/72.56	62.58/68.14	64.80/65.60		69.56/77.67	66.67/71.66	65.36/70.59	68.25/69.05		68.27/77.98	68.25/75.96	62.42/72.55	65.87/69.84		70.18/77.52	69.31/75.28	60.78/68.63	64.81/69.84		63.83/67.54	56.99/57.60	54.08/50.98	57.60/56.80		58.98/59.91	51.33/51.56	52.61/50.49
	JN654459	NADC30	15020	52.7	68.01/77.05	66.06/73.47	60.78/68.14	64.80/65.60		69.51/77.67	66.67/72.56	64.22/71.57	67.46/67.46		68.27/77.67	68.63/77.10	62.75/72.06	68.52/68.25		70.03/77.05	69.84/75.96	62.09/69.61	64.81/67.46		64.25/67.85	57.37/58.05	53.27/52.94	57.60/54.40		58.46/59.91	50.81/52.00	53.27/52.94
	KX169191	FJ1402	15017	52.3	67.75/76.59	65.68/73.70	61.11/68.63	64.00/64.80		69.35/77.36	66.21/73.02	64.87/72.06	67.20/68.25		67.44/77.21	67.65/77.32	63.40/72.55	67.46/68.25		69.30/76.90	69.31/76.19	61.60/69.12	64.02/67.46		63.58/67.54	56.76/58.05	54.08/52.45	57.07/54.40		58.20/59.75	50.44/52.00	53.27/52.94
	KP861625	CHsx1401	15020	52.7	68.01/77.05	65.68/73.70	60.78/67.65	62.93/63.20		69.56/77.36	66.29/72.34	64.38/71.08	66.67/65.87		68.17/77.52	67.80/77.10	62.25/71.57	67.46/65.87		69.92/76.90	69.24/75.96	61.76/69.61	64.55/65.08		63.99/68.01	56.61/58.28	52.94/52.45	58.13/53.60		58.05/60.53	51.04/52.00	54.08/52.94
	KP998476	FJFS	15429	52.4	67.34/76.28	65.31/72.34	62.58/68.63	65.07/64.80		68.42/76.12	66.06/70.29	65.52/70.10	66.93/69.05		67.39/76.43	66.59/73.47	63.40/72.55	66.93/69.84		68.32/75.35	66.21/72.56	61.27/70.10	65.61/68.25		63.52/66.92	55.86/55.78	52.94/50.49	57.33/56.00		57.95/60.06	51.26/50.44	52.94/51.47
	KF287133	HK2	15477	52.8	68.11/77.05	65.68/73.24	63.24/69.61	63.73/65.60		69.72/77.98	65.84/72.79	63.73/70.10	68.25/69.84		68.42/78.45	68.03/76.64	63.24/73.53	69.05/70.63		69.97/77.98	68.71/75.96	59.97/69.61	64.81/69.05		63.01/67.85	56.01/57.82	52.78/50.98	58.67/57.60		58.31/60.06	50.74/51.33	52.94/51.96
	JQ308798	QYYZ	15526	52.5	67.34/76.59	65.91/73.92	62.58/69.12	64.80/65.60		68.58/77.05	66.14/72.56	65.69/70.59	66.93/67.46		67.49/76.90	68.03/76.42	63.24/73.04	66.40/69.05		68.42/76.28	66.36/74.15	61.27/70.59	62.43/66.67		63.73/67.23	56.24/57.60	52.94/50.98	57.07/56.80		57.79/59.75	51.11/51.33	52.78/51.47
	JN662424	GM2	15559	52.2	67.18/76.74	66.59/73.92	62.58/69.12	64.00/64.00		69.46/77.21	66.59/72.56	65.69/70.10	66.14/65.87		68.48/77.98	68.78/76.64	63.40/73.04	65.61/67.46		69.77/76.74	67.12/75.06	61.11/70.59	61.64/63.49		64.19/67.39	56.54/58.05	52.78/50.98	57.33/58.40		58.10/59.75	52.15/52.00	52.78/51.47
	AY150564	VR-2332	15451	52.7	67.34/77.05	66.74/73.92	61.93/67.65	65.16/65.35		69.66/77.52	66.59/72.56	64.71/70.10	69.31/69.29		68.42/78.14	68.93/76.64	64.05/72.06	69.58/70.08		69.72/77.05	67.04/75.06	60.95/69.12	64.81/68.50		64.30/67.85	56.61/58.05	52.94/52.45	57.60/57.14		58.10/60.06	51.85/52.00	52.78/52.45
	AF066183	RespPRRS MLV	15412	52.8	67.34/77.05	66.97/73.92	61.93/67.65	65.33/66.40		69.66/77.52	66.52/72.56	64.71/70.10	69.31/69.84		68.42/78.14	68.71/76.64	64.05/72.06	69.58/70.63		69.72/77.05	67.04/75.28	60.95/69.12	64.81/69.05		64.30/67.85	56.61/57.82	52.94/52.45	57.60/57.60		58.10/60.06	51.93/51.78	52.78/52.45
	FJ175687	PRRSV01	15425	52.7	67.39/77.05	67.04/73.92	61.93/67.65	65.33/66.40		69.66/77.52	66.59/72.56	64.71/70.10	69.31/69.84		68.37/78.14	68.78/76.64	64.05/72.06	69.58/70.63		69.72/77.05	67.12/75.28	60.95/69.12	64.81/69.05		64.25/67.85	56.69/57.82	52.94/52.45	57.60/57.60		58.10/60.06	51.85/51.78	52.78/52.45
	AF331831	BJ-4	15504	52.5	67.24/76.74	66.97/73.92	61.93/67.65	65.33/66.40		69.56/77.21	66.52/72.56	64.71/70.10	69.31/69.84		68.22/77.83	68.71/76.64	64.05/72.06	69.58/70.63		69.56/76.74	67.04/75.28	60.95/69.12	64.81/69.05		64.19/67.54	56.61/57.82	52.94/52.45	57.60/57.60		58.05/59.75	51.93/51.78	52.78/52.45
	AY032626	CH-1a	15432	52.6	67.75/76.90	66.36/73.24	62.42/67.65	64.80/68.00		69.25/77.21	66.14/72.34	65.20/70.59	67.46/69.05		68.22/77.67	67.35/76.19	64.71/71.57	68.25/69.84		69.97/76.59	67.20/75.28	62.25/68.63	66.14/69.84		63.78/67.39	55.40/57.37	52.78/51.47	58.67/57.60		57.22/59.91	50.74/51.33	52.94/51.47
	EU807840	CH-1R	15424	52.5	67.60/76.74	66.21/72.79	62.58/68.14	65.07/67.20		69.04/77.05	66.29/72.56	65.36/71.08	67.72/69.05		68.06/77.52	67.27/75.96	64.87/72.06	68.78/71.43		69.77/76.28	67.42/75.06	62.42/69.12	66.14/69.84		63.73/67.39	55.56/57.60	52.94/51.96	58.93/58.40		56.91/59.60	50.44/50.89	53.10/51.96
	EU880438	HB-1(sh)/2002	15426	52.6	67.55/76.28	65.84/71.66	61.93/66.18	64.00/67.20		69.10/76.59	65.68/71.20	64.87/69.12	66.40/67.46		68.06/77.05	67.04/75.06	64.38/70.10	67.72/68.25		69.77/75.97	66.82/74.15	61.93/67.16	65.08/68.25		63.58/66.77	54.88/56.46	52.12/50.00	57.87/56.00		57.12/59.44	50.22/50.44	52.29/50.00
	EF112445	JXA1	15347	52.6	67.80/77.36	66.14/72.56	63.40/68.63	65.07/64.80		69.25/77.36	66.44/72.56	66.01/71.57	66.14/69.84		68.06/77.98	67.65/76.19	64.87/73.04	67.46/71.43		70.03/76.90	61.53/58.71	62.09/69.61	64.02/68.25		63.52/67.70	55.93/57.60	52.94/51.96	58.93/60.00		57.33/59.91	50.44/51.33	53.10/52.45
	EF635006	HuN4	15352	52.6	67.80/77.36	66.14/73.02	63.07/68.63	65.07/64.80		68.94/77.21	66.44/73.02	65.85/71.57	66.14/69.84		67.91/77.83	67.65/76.64	64.54/73.04	67.46/71.43		69.87/76.74	67.20/75.06	62.09/69.61	64.02/68.25		63.42/67.70	55.86/57.82	52.94/51.96	58.93/60.00		57.17/59.91	50.44/51.33	52.94/52.45
	EF075945	HUB1	15322	52.6	67.91/77.52	66.14/72.79	63.07/68.14	64.80/64.80		69.10/77.52	66.67/73.02	65.69/71.08	66.40/69.84		68.17/78.14	67.57/76.42	64.38/72.55	67.72/71.43		70.03/77.05	67.20/74.83	62.09/69.12	64.29/68.25		63.68/67.85	56.16/57.82	52.61/51.47	59.20/60.00		57.33/60.06	50.67/51.33	53.10/51.96
	DQ988080	Ingelvac ATP	15413	52.5	68.27/77.36	66.67/73.24	63.07/68.14	65.07/67.20		69.35/77.67	66.36/72.56	65.52/71.08	66.14/69.05		67.24/78.14	68.56/76.64	64.38/72.06	68.25/70.63		70.28/76.74	67.95/75.51	62.42/69.12	64.81/68.25		63.52/67.70	55.63/57.60	53.92/51.96	59.20/59.20		57.28/60.22	50.59/51.33	53.59/52.45
others
	NC_001639	LDV	14104	49.4	58.99/62.60	51.32/50.34	51.80/45.10	44.00/39.20		57.44/63.99	52.14/48.98	50.49/42.65	46.77/41.13		58.58/64.14	52.67/49.44	49.67/46.57	49.73/45.16		58.99/63.52	51.62/51.02	49.35/44.12	46.77/38.71		57.75/60.12	53.39/51.36	49.83/43.07	42.01/31.71		56.88/59.32	51.30/50.78	52.38/48.28
	NC_003092	SHFV	15717	50.1	54.81/54.14	44.30/37.06	17.64/9.73	28.65/17.19		55.57/53.99	44.23/37.72	17.77/10.12	29.95/17.19		53.78/54.14	45.61/39.04	17.38/10.12	33.07/17.97		54.14/52.91	44.44/37.50	16.86/10.89	30.21/16.41		52.04/50.46	42.40/38.60	16.60/8.24	31.50/20.47		51.84/50.77	44.44/38.16	16.86/9.02
	NC_002532	EAV	12704	51.7	67.60/76.74	33.66/27.27	21.13/15.74	33.08/24.62		69.04/77.05	33.66/27.47	21.99/14.89	36.13/25.95		68.06/77.52	34.58/28.06	22.41/16.17	36.39/25.19		69.77/76.28	33.99/27.87	23.26/15.74	33.84/22.14		63.73/67.39	35.64/29.70	20.99/12.77	30.51/23.08		56.76/59.44	34.65/29.05	20.28/12.77
