# Supplementary material for: Comparative analysis of newly identified rodent arteriviruses and porcine reproductive and respiratory syndrome virus to characterize their evolutionary relationships
Source: Front Vet Sci. 2023 Apr 3;10:1174031. doi: 10.3389/fvets.2023.1174031 (PMC10106604; doi:10.3389/fvets.2023.1174031)
Supplement: Supplementary file 3 [file Table_2.XLSX]

## Sheet: Table S2
Table S2 Putative transcription regulatory sequences of rodent arterivirus genomes.
ArteVs	Accession ID	ORF Location(nt)		Length				Frame(s)	Putative TRS
				No. of nucleotides		No. of amino acids			TRS（distance[no.of base]to AUG）		TRS location
RtMc-Arterivirus/Tibet2014	KY369967	1a	55..7407		7353		2450	+1		TTAACCAUG		49..54
		1b	7386..11798		4413		1470	+3
		2a	11817..12506		690		229	+3		CTAACC (16) AUG		11795..11800
		2b	11810..12022		213		70	+2
		3	12524..13177		654		217	+2		GGTACC (94) AUG		12424..12429
		4	13039..13575		537		178	+1		TTCCGC (5) AUG		13028..13033
		5a	13577..13714		138		45	+2
		5	13572..14186		615		204	+3		ATAACC (26) AUG		13540..13545
		6	14171..14698		528		175	+2		GCTACC (26) AUG		14139..14144
		7	14685..15056		372		123	+3		ATAACC (123) AUG		14556..14561
RtEi-Arterivirus/SX2014	KY369968	1a	1..7578		7578		2525	+1
		1b	7557..11948		4392		1463	+3
		2a	11924..12676		753		250	+2		ACAACC (21) AUG		11897..11902
		2b	11932..12144		213		70	+1
		3	12535..13332		798		265	+1		GTTACC (83) AUG		12446..12451
		4	13077..13625		549		182	+3		TTCACC (4) AUG		13067..13072
		5a	13627..13761		135		44	+1
		5	13622..14233		612		203	+2		ACAACC (32) AUG		13584..13589
		6	14218..14742		525		174	+1		TAAACC (24) AUG		14188..14193
		7	14732..15103		372		123	+2		ATAACC (123) AUG		14603..14608
RtMruf-Arterivirus/JL2014	KP280006	1a	218..7978		7761		2586	+2		TTAACCAUG		212..217
		1b	7957..12381		4425		1474	+1
		2a	12383..13120		738		245	+2		CTAACA (37) AUG		12340..12345
		2b	12388..12600		213		70	+1
		3	12991..13791		801		266	+1		GTTACC (83) AUG		12902..12907
		4	13533..14084		552		183	+3		TTCACC (4) AUG		13523..13528
		5a	14086..14223		138		45	+1
		5	14114..14695		582		193	+2		CTATCC (35) AUG		14073..14078
		6	14680..15204		525		174	+1		TAAACC (24) AUG		14650..14655
		7	15194..15565		372		123	+2		ATAACC (123) AUG		15065..15070
RtClon-Arterivirus/NX2015	KU302440	1a	3..7421		7419		2472	+3
		1b	7400..11779		4380		1459	+2
		2a	11829..12593		765		254	+3		ATGACC (44) AUG		11779..11784
		2b	11789..12001		213		70	+2
		3	12607..13182		576		191	+1		CTCACC (72) AUG		12529..12534
		4	12933..13481		549		182	+3		TTCACC (4) AUG		12923..12928
		5a	13483..13620		138		45	+1
		5	13511..14092		582		193	+2		TTAGCC (35) AUG		13470..13475
		6	14077..14601		525		174	+1		TCAACC (24) AUG		14047..14052
		7	14591..14959		369		122	+2		ATAACC (123) AUG		14462..14467
RtClan-Arterivirus/GZ2015	KY369969	1a	186..7211		7026		2341	+3		TTAACCAUG		180..185
		1b	7190..11554		4365		1454	+2
		2a	11561..12310		750		249	+2		TCAACC (16) AUG		11539..11544
		2b	11554..11766		213		70	+1
		3	12313..13068		756		251	+1		GTAACC (143) AUG		12164..12169
		4	12807..13334		528		175	+3		TTTACC (7) AUG		12794..12799
		5a	13334..13465		132		43	+2
		5	13344..13934		591		196	+3		TGGGCC (54) AUG		13284..13289
		6	13922..14443		522		173	+2		AAAACC (24) AUG		13892..13897
		7	14433..14801		369		122	+3		GTAACA (123) AUG		14304..14309
