# Supplementary material for: Comparative analysis of newly identified rodent arteriviruses and porcine reproductive and respiratory syndrome virus to characterize their evolutionary relationships
Source: Front Vet Sci. 2023 Apr 3;10:1174031. doi: 10.3389/fvets.2023.1174031 (PMC10106604; doi:10.3389/fvets.2023.1174031)
Supplement: Supplementary file 4 [file Table_3.XLSX]

## Sheet: Table S3
Table S3 Basic arterivirus codon information
ArteVS	Sequence	A%	C%	U%	G%	GC	GC1	GC2	GC3	GC3S	CAI	ENC	L_aa	Gravy	Aromo
rodent arterivirus	RtClan-ArterivirusGZ2015	23.88	26.78	24.12	25.22	52	54.7	45.55	55.74	54.08	0.199	56.37	5074	0.017659	0.095388
	RtClon-ArterivirusNX2015	20.15	27.79	26.21	25.85	53.64	56.96	47.43	56.54	55.02	0.229	55.56	5162	-0.001124	0.094924
	RtEi-ArterivirusSX2014	22.5	26.14	25.86	25.5	51.64	55.94	45.92	53.04	51.33	0.229	57	5299	-0.000887	0.094735
	RtMc-ArterivirusTibet2014	21.44	25.63	26.7	26.23	51.86	55.08	45.89	54.61	52.84	0.217	55.82	5161	0.042492	0.092811
	RtMruf-ArterivirusJL2014	22.39	26.9	25.16	25.54	52.44	56.12	45.93	55.28	53.59	0.228	55.94	5359	-0.003191	0.090689
PRRSV-1	Lelystad virus	21.34	27.31	26.2	25.14	52.45	56.44	46.48	54.45	52.78	0.225	57.1	5171	-0.004042	0.093019
	BJEU06-1	21.33	27.27	26.43	24.97	52.24	56.09	46.59	54.03	52.32	0.222	57.7	5150	0.014641	0.093981
	SHE	21.39	27.19	26.29	25.13	52.32	56.44	46.38	54.14	52.47	0.22	57.47	5171	-0.006343	0.094179
	NVDC-FJ	21.15	27.12	26.56	25.17	52.28	56.21	46.5	54.14	52.46	0.22	57.67	5149	0.017246	0.093028
	FJEU13	21.16	26.88	26.66	25.3	52.18	56.59	46.71	53.24	51.44	0.221	57.46	5152	0.011491	0.093168
	HK3	21.33	27.09	26.45	25.13	52.22	56.07	46.4	54.19	52.48	0.223	57.3	5150	0.000175	0.095534
	HK5	21.43	27.38	26.21	24.97	52.36	56.18	46.57	54.32	52.61	0.222	57.32	5150	0.009689	0.09534
	EuroPRRSV	21.51	27	26.46	25.03	52.03	55.89	46.53	53.68	51.92	0.223	57.15	5154	-0.009177	0.094684
	SD01-08	21.42	27.35	26.16	25.06	52.41	56.35	46.75	54.14	52.45	0.221	57.41	5154	-0.001028	0.09352
	Amervac PRRS	21.41	27.2	26.28	25.12	52.32	56.42	46.38	54.16	52.48	0.22	57.48	5171	-0.007252	0.094179
	lena	21.6	27.22	25.94	25.24	52.46	56.05	46.25	55.07	53.4	0.22	57.61	5125	-0.0168	0.094244
PRRSV-2	MN184A	21.28	26.32	26.06	26.34	52.66	55.49	45.75	56.75	55.17	0.212	57.14	5118	0.049785	0.093005
	NADC30	21.44	26.32	26.08	26.17	52.48	55.41	46.08	55.96	54.34	0.217	57.19	5143	0.03111	0.09547
	FJ1402	21.33	26.2	26.55	25.93	52.12	55.33	45.83	55.2	53.54	0.224	57.25	5397	0.043524	0.099314
	CHsx1401	21.32	26.28	26.21	26.19	52.47	55.36	46.1	55.96	54.33	0.218	57.28	5143	0.04616	0.096053
	FJFS	21.84	26.22	25.87	26.07	52.3	55.19	45.6	56.1	54.35	0.217	57.79	5279	0.002311	0.093389
	HK2	21.65	26.59	25.79	25.97	52.56	55.44	46.38	55.85	54.25	0.212	57.51	5311	0.020731	0.092826
	QYYZ	21.56	26.63	25.79	26.02	52.66	55.94	45.7	56.32	54.66	0.22	57.28	5274	0.017292	0.092909
	GM2	21.89	26.36	25.9	25.85	52.21	55.49	45.66	55.49	53.82	0.22	57.8	5308	0.01786	0.09269
	VR-2332	21.63	26.61	25.75	26.01	52.62	55.91	45.71	56.23	54.55	0.219	57.31	5275	0.01272	0.092322
	RespPRRS MLV	21.64	26.58	25.82	25.97	52.54	55.88	45.64	56.12	54.43	0.22	57.29	5275	0.014711	0.093081
	PRRSV01	21.6	26.57	25.83	26	52.57	55.91	45.75	56.05	54.36	0.22	57.31	5275	0.015185	0.092701
	BJ-4	21.56	26.63	25.79	26.02	52.66	55.94	45.7	56.32	54.66	0.22	57.28	5274	0.017292	0.092909
	CH-1a	21.55	26.43	26.02	26	52.43	55.84	45.64	55.82	54.09	0.215	57.47	5274	0.019113	0.093288
	CH-1R	21.61	26.39	26.05	25.95	52.34	55.7	45.7	55.62	53.9	0.216	57.51	5273	0.01172	0.094443
	HB-1(sh)2002	21.55	26.36	26.02	26.07	52.43	55.84	45.64	55.82	54.09	0.223	57.51	5274	0.004759	0.093288
	JXA1	21.56	26.34	26.08	26.03	52.36	55.53	45.63	55.93	54.21	0.219	57.55	5244	0.01045	0.093249
	HuN4	21.55	26.29	26.13	26.03	52.32	55.51	45.65	55.79	54.05	0.219	57.53	5244	0.008982	0.093631
	HUB1	21.57	26.34	26.08	26.01	52.34	55.68	45.63	55.72	53.99	0.22	57.42	5244	0.005587	0.093059
	Ingelvac ATP	21.7	26.42	26	25.87	52.29	55.93	45.64	55.31	53.54	0.219	57.38	5275	0.002863	0.092891
LDV	Lactate dehydrogenase-elevating virus	22.88	23.46	27.86	25.8	49.25	52.92	43.33	51.51	49.87	0.22	57.06	4816	0.092193	0.097176

## Sheet: RSCU-无序列号
GeneID	UUU	UUC	UUA	UUG	UCU	UCC	UCA	UCG	UAU	UAC	UAA	UAG	UGU	UGC	UGA	UGG	CUU	CUC	CUA	CUG	CCU	CCC	CCA	CCG	CAU	CAC	CAA	CAG	CGU	CGC	CGA	CGG	AUU	AUC	AUA	AUG	ACU	ACC	ACA	ACG	AAU	AAC	AAA	AAG	AGU	AGC	AGA	AGG	GUU
Amervac PRRS	1.01	0.99	0.4	1.23	1.3	1.75	1.01	0.63	0.95	1.05	1.5	0.6	1.07	0.93	0.9	1	1.45	1.31	0.54	1.08	1.27	0.94	1.01	0.78	1.11	0.89	0.89	1.11	0.98	1.27	0.81	0.98	1.3	1.03	0.67	1	0.91	1.49	1.02	0.59	0.87	1.13	1	1	0.63	0.69	0.81	1.15	1.14
BJ-4	1.21	0.79	0.36	1.39	1.3	1.54	0.75	0.68	0.88	1.12	0.3	0.9	0.91	1.09	1.8	1	1.33	1.22	0.5	1.2	1.24	1.12	0.86	0.78	1.02	0.98	0.83	1.17	0.75	1.39	0.56	1.02	1.13	1.32	0.55	1	1.06	1.59	0.76	0.59	0.91	1.09	1	1	0.79	0.94	1.02	1.27	1.23
BJEU06-1	1.01	0.99	0.5	1.12	1.42	1.6	0.98	0.64	0.97	1.03	1.2	0.6	1.1	0.9	1.2	1	1.34	1.42	0.58	1.04	1.31	0.9	1.02	0.76	1.09	0.91	0.92	1.08	1.01	1.35	0.8	0.95	1.19	1.14	0.67	1	1.01	1.54	0.9	0.55	0.89	1.11	0.94	1.06	0.64	0.71	0.84	1.05	1.21
CH-1a	1.16	0.84	0.44	1.27	1.31	1.53	0.75	0.67	0.94	1.06	0.55	0.82	0.85	1.15	1.64	1	1.38	1.25	0.52	1.14	1.36	1.04	0.82	0.78	1.09	0.91	0.86	1.14	0.74	1.25	0.7	0.88	1.19	1.29	0.52	1	1.02	1.61	0.8	0.58	0.98	1.02	0.99	1.01	0.78	0.97	0.92	1.5	1.22
CH-1R	1.19	0.81	0.44	1.29	1.28	1.57	0.71	0.7	0.93	1.07	0.55	0.82	0.84	1.16	1.64	1	1.35	1.25	0.53	1.14	1.38	1.02	0.84	0.77	1.12	0.88	0.88	1.12	0.78	1.25	0.7	0.86	1.16	1.29	0.55	1	1.03	1.59	0.8	0.58	0.99	1.01	1	1	0.79	0.95	0.92	1.48	1.24
CHsx1401	1.21	0.79	0.34	1.53	1.2	1.52	0.93	0.55	1	1	0.82	0.82	0.91	1.09	1.36	1	1.43	1.23	0.29	1.18	1.24	1.04	0.93	0.79	0.92	1.08	0.9	1.1	0.7	1.28	0.6	0.94	1.12	1.21	0.68	1	1.04	1.58	0.71	0.66	0.85	1.15	0.96	1.04	0.76	1.04	1.09	1.4	1.33
EAV	1.04	0.96	0.73	1.54	1.16	1.12	1.34	0.48	0.86	1.14	1	0.67	0.98	1.02	1.33	1	0.96	0.65	0.56	1.55	1.08	1.05	1.17	0.69	0.88	1.12	0.87	1.13	1.17	1.81	0.88	0.88	1.46	1.06	0.48	1	1.12	1.37	1.01	0.5	1.06	0.94	1.04	0.96	0.95	0.95	0.5	0.77	1.09
EuroPRRSV	1.07	0.93	0.46	1.19	1.41	1.71	1.03	0.63	0.92	1.08	1.2	0.6	1.12	0.88	1.2	1	1.31	1.45	0.49	1.1	1.35	0.9	1.04	0.71	1.11	0.89	1.02	0.98	1.02	1.27	0.83	0.87	1.32	1.11	0.57	1	0.94	1.53	0.97	0.56	0.78	1.22	0.94	1.06	0.66	0.56	0.85	1.17	1.19
FJ1402	1.2	0.8	0.42	1.46	1.2	1.59	0.93	0.49	0.88	1.13	0.5	1	0.92	1.08	1.5	1	1.41	1.18	0.3	1.23	1.36	0.94	0.96	0.74	1.05	0.95	0.88	1.12	0.81	1.31	0.61	1.03	1.28	1.1	0.62	1	0.98	1.58	0.87	0.57	0.87	1.13	0.98	1.02	0.74	1.05	0.91	1.33	1.31
FJEU13	1.06	0.94	0.46	1.26	1.49	1.68	1.03	0.55	1.01	0.99	1.2	0.6	1.03	0.97	1.2	1	1.44	1.34	0.51	0.99	1.34	0.91	0.96	0.8	1.03	0.97	0.98	1.02	1.11	1.19	0.84	0.88	1.21	1.16	0.63	1	1.15	1.36	0.94	0.54	0.88	1.12	1.04	0.96	0.65	0.59	0.9	1.09	1.13
FJFS	1.12	0.88	0.43	1.35	1.36	1.36	0.8	0.62	0.97	1.03	0.3	0.9	0.96	1.04	1.8	1	1.24	1.21	0.58	1.2	1.26	1.07	0.8	0.87	1.03	0.97	0.91	1.09	0.85	1.19	0.7	0.83	1.21	1.25	0.54	1	1.09	1.58	0.74	0.59	0.92	1.08	0.99	1.01	0.87	0.99	0.89	1.55	1.2
GM2	1.18	0.82	0.46	1.28	1.3	1.46	0.74	0.68	1.03	0.97	0.3	0.9	0.96	1.04	1.8	1	1.28	1.25	0.55	1.18	1.23	1.04	0.87	0.86	1.06	0.94	0.92	1.08	0.77	1.3	0.66	0.86	1.16	1.28	0.56	1	1.02	1.55	0.79	0.64	0.9	1.1	1.05	0.95	0.78	1.04	0.97	1.45	1.35
HB-1	1.16	0.84	0.44	1.27	1.31	1.53	0.75	0.67	0.94	1.06	0.55	0.82	0.85	1.15	1.64	1	1.39	1.25	0.51	1.15	1.3	0.82	0.87	1.01	1.09	0.91	0.86	1.14	0.92	1.27	0.72	0.9	1.19	1.29	0.52	1	1.02	1.61	0.8	0.58	0.98	1.02	0.99	1.01	0.78	0.97	0.83	1.35	1.22
HK2	1.14	0.86	0.39	1.45	1.37	1.48	0.82	0.58	1.02	0.98	0.3	0.9	1	1	1.8	1	1.25	1.22	0.65	1.05	1.31	1.08	0.85	0.75	0.85	1.15	0.88	1.12	0.78	1.26	0.66	0.94	1.28	1.14	0.58	1	0.95	1.67	0.73	0.65	0.86	1.14	0.92	1.08	0.69	1.06	1	1.36	1.14
HK3	1.02	0.98	0.43	1.19	1.48	1.61	0.99	0.61	0.98	1.02	1.5	0.6	0.98	1.02	0.9	1	1.42	1.33	0.51	1.13	1.21	0.97	1.03	0.79	1.03	0.97	0.94	1.06	1.06	1.23	0.88	0.97	1.28	1.07	0.65	1	1	1.59	0.88	0.53	0.98	1.02	1	1	0.75	0.56	0.65	1.21	1.18
HK5	0.98	1.02	0.44	1.17	1.41	1.6	0.97	0.64	0.99	1.01	1.5	0.6	1.02	0.98	0.9	1	1.37	1.38	0.55	1.09	1.27	0.95	1.04	0.74	0.99	1.01	0.97	1.03	0.94	1.36	0.83	0.99	1.3	1.02	0.68	1	1	1.57	0.94	0.49	0.89	1.11	1.05	0.95	0.7	0.68	0.68	1.2	1.25
HUB1	1.14	0.86	0.45	1.25	1.25	1.54	0.83	0.67	0.88	1.12	0.55	0.82	0.83	1.17	1.64	1	1.35	1.3	0.46	1.18	1.38	1.03	0.76	0.83	1.01	0.99	0.95	1.05	0.76	1.26	0.61	0.91	1.28	1.23	0.49	1	1.15	1.47	0.85	0.53	0.91	1.09	1.01	0.99	0.85	0.86	1.03	1.43	1.24
HuN4	1.15	0.85	0.49	1.23	1.24	1.56	0.8	0.69	0.91	1.09	0.55	0.82	0.82	1.18	1.64	1	1.34	1.3	0.48	1.17	1.38	1.03	0.77	0.82	1.01	0.99	0.94	1.06	0.81	1.19	0.65	0.9	1.24	1.27	0.5	1	1.14	1.47	0.85	0.53	0.92	1.08	0.98	1.02	0.83	0.87	1	1.46	1.24
Ingelvac ATP	1.2	0.8	0.42	1.27	1.35	1.51	1.51	0.66	0.91	1.09	0.6	0.9	0.89	1.11	1.5	1	1.37	1.26	0.46	1.21	1.34	1.06	0.92	0.68	0.99	1.01	0.89	1.11	0.75	1.43	0.54	0.89	1.22	1.22	0.57	1	1.16	1.44	0.84	0.57	0.94	1.06	1.01	0.99	0.79	0.92	0.98	1.41	1.23
JXA1	1.12	0.88	0.46	1.25	1.27	1.55	0.8	0.69	0.9	1.1	0.55	0.82	0.84	1.16	1.64	1	1.34	1.29	0.48	1.18	1.37	1.03	0.78	0.82	0.99	1.01	0.95	1.05	0.77	1.23	0.65	0.9	1.26	1.23	0.51	1	1.11	1.5	0.83	0.56	0.9	1.1	0.98	1.02	0.84	0.86	1.02	1.44	1.22
LDV	1.25	0.75	0.49	1.99	1.33	1.15	1.15	0.41	1.01	0.99	0.9	0.9	1.09	0.91	1.2	1	1.04	0.7	0.57	1.21	1.14	1.13	1.05	0.68	1.17	0.83	0.86	1.14	0.73	1.28	0.78	0.98	1.3	1.17	0.54	1	0.95	1.71	0.94	0.4	1.12	0.88	0.93	1.07	0.96	0.99	1.18	1.05	1.17
Lelystad virus	1	1	0.38	1.2	1.37	1.74	1	0.62	0.84	1.16	1.2	0.6	1.1	0.9	1.2	1	1.41	1.36	0.5	1.14	1.32	0.92	1.03	0.73	1.07	0.93	0.89	1.11	0.91	1.39	0.89	0.93	1.22	1.12	0.66	1	0.94	1.52	0.97	0.57	0.8	1.2	0.99	1.01	0.61	0.65	0.76	1.12	1.15
lena	0.92	1.08	0.36	1.35	1.57	1.31	1.06	0.79	0.95	1.05	0.6	0.9	1.06	0.94	1.5	1	1.3	1.3	0.65	1.05	1.05	1.18	1	0.77	0.96	1.04	0.98	1.02	0.87	1.58	0.78	1.03	1.2	1.05	0.75	1	1.04	1.55	0.79	0.61	0.78	1.22	0.91	1.09	0.78	0.49	0.76	0.98	1.16
MN184A	1.19	0.81	0.38	1.53	1.06	1.67	0.79	0.66	0.91	1.09	0.55	0.82	1	1	1.64	1	1.29	1.22	0.46	1.11	1.24	1.1	0.87	0.79	1	1	0.88	1.12	0.86	1.23	0.48	0.96	1.17	1.15	0.68	1	1.04	1.69	0.61	0.66	0.92	1.08	0.95	1.05	0.85	0.97	1.09	1.38	1.28
NADC30	1.22	0.78	0.36	1.48	1.15	1.5	0.88	0.62	0.95	1.05	0.55	0.82	0.96	1.04	1.64	1	1.41	1.23	0.3	1.22	1.26	1.06	0.94	0.75	0.93	1.07	0.88	1.12	0.69	1.37	0.61	0.93	1.23	1.16	0.61	1	0.94	1.67	0.74	0.65	0.86	1.14	0.93	1.07	0.74	1.11	0.99	1.41	1.3
NVDC-FJ	1.01	0.99	0.49	1.15	1.54	1.51	0.98	0.66	1.08	0.92	1.8	0.6	1.09	0.91	0.6	1	1.44	1.35	0.56	1.02	1.29	0.89	0.9	0.91	1.03	0.97	0.96	1.04	0.99	1.26	0.84	1.09	1.02	1.26	0.72	1	0.98	1.48	0.93	0.61	0.88	1.13	0.98	1.02	0.71	0.59	0.73	1.09	1.22
PRRSV01	1.21	0.79	0.36	1.39	1.33	1.54	0.75	0.66	0.88	1.12	0.3	0.9	0.94	1.06	1.8	1	1.35	1.22	0.5	1.18	1.25	1.09	0.88	0.78	1.02	0.98	0.83	1.17	0.77	1.39	0.56	1.01	1.13	1.3	0.58	1	1.08	1.57	0.79	0.56	0.89	1.11	0.98	1.02	0.82	0.9	1.01	1.26	1.23
QYYZ	1.21	0.79	0.36	1.39	1.3	1.54	0.75	0.68	0.88	1.12	0.3	0.9	0.91	1.09	1.8	1	1.33	1.22	0.5	1.2	1.24	1.12	0.86	0.78	1.02	0.98	0.83	1.17	0.75	1.39	0.56	1.02	1.13	1.32	0.55	1	1.06	1.59	0.76	0.59	0.91	1.09	1	1	0.79	0.94	1.02	1.27	1.23
RespPRRS MLV	1.21	0.79	0.36	1.39	1.31	1.53	0.74	0.66	0.89	1.11	0.3	0.9	0.93	1.07	1.8	1	1.34	1.22	0.5	1.18	1.25	1.1	0.88	0.77	1.04	0.96	0.84	1.16	0.75	1.42	0.56	1.02	1.13	1.3	0.58	1	1.06	1.6	0.77	0.58	0.91	1.09	0.98	1.02	0.81	0.95	1.02	1.23	1.23
RtClan-Arterivirus/GZ2015	1.06	0.94	0.46	1.6	0.81	1.26	1.45	0.6	1.06	0.94	0.6	0.9	0.59	1.41	1.5	1	1.14	1.01	0.72	1.08	0.7	1.3	1.47	0.53	1	1	0.98	1.02	0.75	1.55	0.66	0.77	1.08	1.03	0.89	1	0.57	1.67	1.37	0.39	0.92	1.08	1	1	0.62	1.26	0.93	1.34	1.03
RtClon-Arterivirus/NX2015	1.13	0.87	0.39	1.31	1.24	1.69	0.99	0.71	1.16	0.84	0.9	0.6	0.86	1.14	1.5	1	1.27	1.24	0.45	1.34	1.14	1.13	0.97	0.76	0.8	1.2	0.76	1.24	0.8	1.68	0.6	1.16	1.5	0.98	0.52	1	0.99	1.57	0.96	0.48	1.2	0.8	0.89	1.11	0.56	0.82	0.66	1.1	1.49
RtEi-Arterivirus/SX2014	1.17	0.83	0.44	1.42	1.13	1.39	1.31	0.34	1.07	0.93	1.2	0.6	0.8	1.2	1.2	1	1.16	1.06	0.48	1.44	1.3	1.01	1.06	0.63	0.93	1.07	0.8	1.2	0.95	1.42	0.43	1.04	1.22	1.03	0.75	1	0.9	1.65	1.01	0.44	1.03	0.97	0.86	1.14	0.89	0.94	1.02	1.15	1.14
RtMc-Arterivirus/Tibet2014	1.35	0.65	0.38	1.59	1.37	1.48	0.92	0.62	1.23	0.77	0.9	0.6	0.79	1.21	1.5	1	1.37	0.94	0.36	1.36	1.11	1.28	0.87	0.74	1.02	0.98	0.8	1.2	0.74	1.48	0.44	0.93	1.28	1.02	0.7	1	1.12	1.6	0.75	0.53	1.23	0.77	0.87	1.13	0.68	0.94	0.86	1.55	1.3
RtMruf-Arterivirus/JL2014	1.17	0.83	0.31	1.45	1.13	1.65	1.01	0.56	1.01	0.99	1.8	0.6	0.68	1.32	0.6	1	1.19	1.24	0.42	1.39	1.05	1.15	1.21	0.58	0.91	1.09	0.74	1.26	0.66	1.74	0.61	0.87	1.51	0.96	0.53	1	0.92	1.62	1.05	0.4	1.02	0.98	1	1	0.87	0.78	1.04	1.08	1.09
SD01-08	1.02	0.98	0.47	1.14	1.39	1.6	1.08	0.61	0.96	1.04	1.5	0.6	1.09	0.91	0.9	1	1.39	1.4	0.44	1.16	1.27	1.04	0.99	0.7	1.08	0.92	0.96	1.04	0.81	1.46	0.84	1.01	1.1	1.23	0.67	1	0.99	1.43	0.97	0.61	0.82	1.18	0.94	1.06	0.7	0.62	0.75	1.14	1.11
SHE	1.02	0.98	0.4	1.22	1.3	1.75	1	0.64	0.95	1.05	1.5	0.6	1.07	0.93	0.9	1	1.43	1.32	0.54	1.09	1.28	0.94	1	0.79	1.12	0.88	0.89	1.11	0.96	1.29	0.83	0.98	1.29	1.03	0.68	1	0.93	1.48	1.02	0.58	0.86	1.14	1	1	0.63	0.68	0.81	1.13	1.13
SHFV	0.94	1.06	0.57	1.14	1.65	1.3	1.35	0.39	0.86	1.14	1.5	0.86	0.85	1.15	0.64	1	1.17	1.39	0.56	1.17	1.28	1.16	1.01	0.55	0.93	1.07	0.91	1.09	1.06	1.47	0.67	0.71	1.18	1.4	0.43	1	1.32	1.27	0.97	0.44	0.95	1.05	0.86	1.14	0.74	0.58	1.01	1.08	1.36
VR-2332	1.21	0.79	0.37	1.4	1.3	1.56	0.74	0.66	0.9	1.1	0.3	0.9	0.93	1.07	1.8	1	1.33	1.22	0.51	1.18	1.24	1.09	0.89	0.78	1.05	0.95	0.84	1.16	0.74	1.41	0.58	1.01	1.13	1.3	0.58	1	1.06	1.59	0.77	0.58	0.91	1.09	0.98	1.02	0.8	0.95	1.03	1.22	1.21
[truncated: 15 more columns]
